# Supplementary material for: Development and Comparison of Empirical Models for All-sky Downward Longwave Radiation Estimation at the Ocean Surface Using Long-term Observations
Source: Copernicus journal article supplement (doi:10.5194/amt-2024-85), 2024-07-09
Supplement: Supplementary file [file amt-2024-85-AC2-supplement.pdf]

## **Response to Reviewer #2's comments:**

**General:** *This study uses data from 65 moored buoys, supplemented with satellite and reanalysis data to evaluate eight existing models for downward longwave radiation  $R_l$ , as well as a new model developed here called "modnew". The hourly and daily-averaged  $R_l$  estimated from modnew model have overall relatively low errors – very good news as these observations are not widely available. I applaud the authors for gathering so many historic LWR buoy measurements! What a job and what a resource.*

### **Response:**

Thank you for your positive feedback and encouraging remarks regarding our study. We are delighted that you recognize the value of our effort in compiling and analyzing this extensive dataset of historic longwave radiation (LWR) buoy measurements. Your thoughtful and detailed comments have significantly enhanced the quality of our manuscript. Below, we provide a detailed response to each of your comments.

### **Comment #1:**

*My major concern though is with the universal application of the Pascal & Josey 2000 (PJ2000) longwave radiation (LWR) correction applied to all 65 buoy timeseries.*

*The PJ2000 LWR Correction =  $(a + \lambda)R_{\text{solar}} + b(R_{\text{solar}})^2$  ,*

*with  $a=0.00434$ ,  $\lambda = 0.011$ ,  $b= 1.72 \times 10^{-6}$ . This is a large correction if  $R_{\text{solar}} \sim 1000 \text{ W/m}^2$ !*

*The polynomial terms involving  $a$  &  $b$  ( $a \cdot R_{\text{solar}} + b \cdot R_{\text{solar}}^2$ ) are a correction for the differential heating of the dome and casing. The last sentence in PJ2000 is "We suggest that such a correction should be made in future analyses if the component temperatures are not logged in order to improve the accuracy of the measured longwave flux". I have emphasized the "if" part here because most if not all of the OceanSITES (including all from NOAA/PMEL, e.g., GTMBA, KEO, Papa, ARC ) LWR sensors are the 3 output Eppley sensors that measure case and dome temperature and correct for this effect. This correction has been done by the data provider and should not be done by the user. Essentially the authors here have double corrected these data.*

### **Response:**

Thank you for raising this critical concern regarding the application of the Pascal & Josey (2000) correction across all buoy datasets. We acknowledge that the correction's applicability depends on sensor-specific configurations. Our responses to the key points are as follows:

#### **1. Prevalence of High $R_{\text{solar}}$ Values**

While  $R_{\text{solar}} \approx 1000 \text{ W/m}^2$  can occur, such extreme values are rare in our datasets due to typical oceanic cloud cover. Only 1.1% of hourly  $R_{\text{solar}}$  data exceeded  $1000 \text{ W/m}^2$ , limiting the correction's impact.

#### **2. Data Quality and Pre-Calibration**

We used "Highest Quality" data, which undergo pre-deployment calibration in the laboratory, as indicated by the quality code definitions (detailed below). While case and dome temperature corrections were not directly available to us, applying a global, consistent correction such as PJ2000 was considered a practical alternative to ensure uniform treatment across all datasets.

0 = Datum Missing.

1 = Highest Quality. Pre/post-deployment calibrations agree to within sensor specifications. In most cases, only pre-deployment calibrations have been applied.

2 = Default Quality. Default value for sensors presently deployed and for sensors which were either not recovered, not calibratable when recovered, or for which pre-deployment calibrations have been determined to be invalid. In most cases, only pre-deployment calibrations have been applied.

3 = Adjusted Data. Pre/post calibrations differ, or original data do not agree with other data sources (e.g., other in situ data or climatology), or original data are noisy. Data have been adjusted in an attempt to reduce the error.

4 = Lower Quality. Pre/post calibrations differ, or data do not agree with other data sources (e.g., other in situ data or climatology), or data are noisy. Data could not be confidently adjusted to correct for error.

5 = Sensor or Tube Failed.

### 3. Magnitude of Adjustment

Our analysis revealed that the correction resulted in differences of less than 3 W/m<sup>2</sup> for 89% of hourly-scale LWR data, within the observational uncertainty of 10 W/m<sup>2</sup>. This suggests minimal over-correction impact.

### 4. Purpose of the Data

Importantly, the buoy data were not used to validate the LWR products but rather to develop the estimation model. Systematic differences, including potential over-corrections, are accounted for as part of the model's offsets, preserving the integrity of our conclusions.

We appreciate the opportunity to clarify this point and hope this addresses your concern.

### Comment #2:

*The lambda term, on the otherhand, is intended to correct for solar radiation leakage caused by pinholes or degradation of the dielectric coating on the sensor dome. It is not a universal problem and PJ2000 found that the lambda ranged from 0.007 to 0.024. The 0.011 lambda value is thus a middle of the road case. In some cases, the authors will be adding an error, while in other cases, they will be partially fixing it. Perhaps if the authors keep this correction, it might be also treated as an uncertainty estimate.*

*Alternatively, its more work, but one indication that solar radiation leakage is an issue is if there is a noontime peak in LWR during clearsky days. Perhaps this correction should be applied only in those cases?*

### Response:

We appreciate your insights into the variability of the lambda term correction. Here is our detailed response:

- The lambda term addresses solar radiation leakage, and its effect varies among sensors. While most sensors exhibit such leakage, the differences between  $\lambda=0.007$ , 0.011, and 0.024 resulted in minimal changes to LWR, with 78% and 72% of samples showing deviations less than 1 W/m<sup>2</sup> and 4 W/m<sup>2</sup>, respectively. These values are below the instruments' uncertainty.
- The potential noontime peak in LWR on clear-sky days was considered, but we find that the calibrated differences during non-peak periods remain within the instruments' uncertainty.

Given these results, we maintain that applying a consistent lambda correction introduces negligible bias and does not alter our conclusions.

**Comment #3:**

*The bottom line is that I think the authors should go back and check which sensors are 3-output LWR and then redo the analysis without the a & b terms in the correction for those sites. The authors may also want to review their use of the lambda term correction.*

**Response:**

Thank you for this valuable suggestion. We confirm that we used "high-quality" datasets consisting of raw data that had not been post-processed by the data providers. For these datasets, the Pascal & Josey (2000) correction was applied uniformly to ensure consistency.

Regarding the lambda term correction, we refer you to our detailed response to Comment #2, where we address its impact in our analysis.

**Comment #4:**

*Most of my other comments are to help clarify text, figures, and tables.*

*With the analysis redone with corrections only applied to the subset of observations that do not already have the correction for heating & solar radiation leakage, and with the manuscript revised for clarity, I expect this will eventually make for a well-cited paper.*

*Comments to improve clarity:*

*Table 1 Caption: Add statement that Variables are defined in Table 2.*

**Response:**

Thank you for your suggestion. We have added the requested clarification to the caption. The revised caption now reads:

"Eight Existing Models for Ocean-Surface  $R_l$  Estimation, with Variables Defined in Table 2."

**Comment #5:**

*Table 1. Consider expanding this to also include Modnew model. I think this would help the reader find the equation and see its structure in relation to the other models.*

**Response:**

Thank you for the suggestion. Table 1 is intended to present only the existing estimation models for comparison purposes. Since Modnew is a newly developed model introduced in this study, we have chosen to discuss it separately.

**Comment #6:**

*Table 2 show all variables used in this study, including  $R_l$ ,  $R_g$ ,  $DSR_{toa}$ ,  $CBH$  etc.*

**Response:**

Thank you for your suggestion. We have updated Table 2 to include all the variables used in this study, such as  $R_l$ ,  $R_g$ , and  $DSR_{toa}$ . However, we have excluded  $CBH$  as it was not utilized in our analysis.

**Comment #7:**

*Table 3. In the text, it would be nice if you said where or who these 8 OceanSITES stations are. If 4 of these OceanSITES stations are from TAO (this needs to be clarified), then you only need to describe 4 stations, or even fewer groups as some of these stations (e.g. KEO and Papa) are from one group (NOAA*

*Ocean Climate Stations*). These smaller groups making these long *OceanSITES* time series would benefit from being named in this analysis.

**Response:**

Thank you for this suggestion. We have clarified the origin of the 8 *OceanSITES* stations in the manuscript by adding the following sentence:

*"Eight sites from OceanSITES were utilized, specifically: OS\_PAPA, OS\_KAUST, OS\_NTAS, OS\_KEO, OS\_ARC, OS\_JKEO, OS\_STRATUS, and OS\_WHOTS."*

This ensures transparency and acknowledges the specific sources of these long-term time series datasets.

**Comment #8:**

*Figure 2 caption. What is being represented by the color bar in the left column? What are its units? In the right column, what are the error levels in the "box plots"?*

**Response:**

Thank you for pointing this out. We have clarified the caption for Figure 2 as follows:

*"In the left column, the color bar represents points per unit area. In the right column, the dots indicate the mean value of the  $\Delta R_i$  (ME), while the vertical lines represent the standard error of the mean (SEM)."*

**Comment #9:**

*Figure 3 caption. What is being represented by the color bar in a and b? What are the units?*

**Response:**

Thank you for your question. The information in the caption of Figure 3 aligns with the clarification provided in our response to Comment #8:

*"In panels a and b, the color bar represents points per unit area."*

**Comment #10:**

*Figure 4 caption. Same as #6 comment. Also, what is the daytime vs. nighttime criteria?*

**Response:**

We have clarified this in the manuscript as follows:

*"The hourly samples used for independent validation were further divided into daytime ( $R_g > 120 \text{ W/m}^2$ ) and nighttime conditions ( $R_g \leq 120 \text{ W/m}^2$ )"*

**Comment #11:**

*Figure 7 caption. Same as #6 comment.*

**Response:**

For Figure 7, the color bar represents points per unit area.

**Comment #12:**

*Figure 11. Could you make the y-axis labeling more concise so that it is legible? Also please define what the different levels are in the box plots.*

**Response:**

We have fixed the Figure 11. The top edge, center, and bottom edge of the box represent the 75th, 50th (median), and 25th percentiles, respectively. The whiskers indicate the maximum and minimum values within 1.5 times the interquartile range (IQR), and the circles denote outliers.

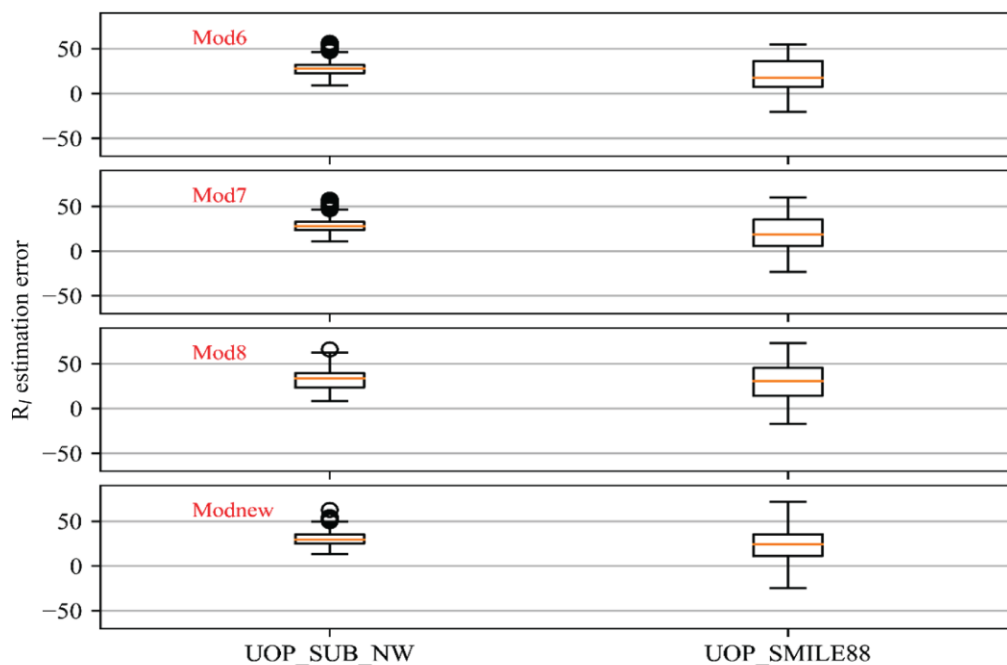

**Comment #13:**

*Throughout the text, the observations are described as “screen-level”. What does this mean? I’ve never heard of this.*

**Response:**

Thank you for pointing this out. In meteorology, "screen-level temperature" refers to the air temperature measured at a standard height of 2 meters above the ground.

**Good, E. J. (2016). An in situ-based analysis of the relationship between land surface “skin” and screen-level air temperatures. *Journal of Geophysical Research: Atmospheres*, 121(15), 8801–8819. <https://doi.org/10.1002/2016JD025318>**

**Comment #14:**

*Line 41, “Although the ocean-surface R<sub>l</sub> is routinely measured at most buoy sites...”. Unfortunately, this hasn’t been true. Of the 55 TAO sites, only 4 have routinely measured longwave radiation. This is being changed in response to the Tropical Pacific Observing System (TPOS) 2020 project (Kessler et al. 2021), but historically and currently, this statement is only true for OceanSITES bulk flux buoy stations.*

**Response:**

Thank you for bringing this to our attention. We have revised the sentence to remove the word “routinely” to ensure accuracy.

**Comment #15:**

Line 52. “*complicacy*” is the wrong word I think. Perhaps “*complexity*” ?

**Response:**

Thank you for pointing this out. We have replaced “*complicacy*” with “*complexity*” to improve accuracy and readability.

**Comment #16:**

Line 81 “*mid-high*” --> “*mid-to-high*” ?

**Response:**

Thank you for your suggestion. We have updated “*mid-high*” to “*mid-to-high*” for improved clarity and correctness.

**Comment #17:**

Line 312 “*At last*” --> “*In total*” ?

**Response:**

Thank you for your suggestion. We have replaced “*At last*” with “*In total*”.

**Comment #18:**

Line 324 “*On the contrary*” --> “*On the otherhand*” ? or “*In contrast*”

**Response:**

Thank you for your suggestion. We have replaced “*On the contrary*” with “*On the other hand*”.

**Comment #19:**

Line 331. *For regions where winds are weak, afternoon near surface stratification can cause the skin temperature to be quite a bit warmer than the bulk SST. This is mainly an issue in the tropics but can also matter in the summer elsewhere. See Cronin et al. (2024) or Clayson and Bogdanoff (2013)*

**Response:**

Thank you for your insightful comment. While we acknowledge that near-surface stratification and skin temperature deviations from bulk SST can occur under low-wind conditions, especially in tropical regions and during summer, this specific issue is beyond the scope of our study, which focuses on downward longwave radiation (RL) estimation.

We emphasize the importance of addressing such stratification effects in regions with consistently low wind speeds, where autonomous ship-of-opportunity radiometer systems are particularly useful. However, in our dataset, 83% of the samples were observed under wind speeds exceeding 4 m/s, meaning the conditions for significant stratification effects were rare. Therefore, the applied correction remains valid for the majority of our dataset.

Furthermore, **only Mod6** incorporates SST as a model parameter, and its influence is moderated by the Stefan-Boltzmann constant ( $\sigma=5.67\times 10^{-8}$ ). As a result, any potential deviations between skin and bulk SST have a minimal impact on the model's performance and do not affect the overall conclusions of our study.

We appreciate the suggested references for further exploration and recognize their relevance to studies focused specifically on stratification effects.

**Comment #20:**

*Line 369, this should reference Table 2, not Table 1.*

**Response:**

Thank you for catching this oversight. We have corrected the reference to point to Table 2 instead of Table 1.

**Comment #21:**

*Line 403. What is CBH ? Perhaps this needs to be included in Table 2.*

**Response:**

Thank you for your comment. In meteorology, CBH typically stands for Cloud Base Height, which refers to the height of the base of a cloud layer above the ground. CBH was not utilized in our study. Therefore, we have chosen not to include it in Table 2.

**Comment #22:**

*Section 4.2.1 Clear sky, is very short. Section 4.2 is Model comparison results, but this 4.2.1 has no results/analysis. How do we interpret these results? Or will that be discussed later? Please let the reader know.*

**Response:**

Thank you for your comment. Section 4.2.1 serves as a subtitle and is further divided into two subsections: 4.2.1.1 (clear sky hourly scale) and 4.2.1.2 (clear sky daily scale). The results and analysis for clear sky conditions are presented within these subsections.

**Comment #23:**

*Line 519. "On the contrary" --> "In contrast"*

**Response:**

Thank you for your suggestion. We have replaced "On the contrary" with "In contrast".

**Comment #24:**

*Paragraph 2 of the Conclusion. Could you use some more words to describe the physical dependencies of the model? This paragraph relies too heavily upon variable names which may be unfamiliar to some readers.*

**Response:**

Thank you for this excellent suggestion. We have expanded the paragraph in the conclusion to include more detailed descriptions of the physical dependencies of the model. The revised text is as follows:

*"In this study, the newly developed Modnew model estimates all-sky ocean-surface downward longwave radiation (RL) by incorporating key atmospheric and cloud parameters: screen-level air temperature ( $T_a$ ), relative humidity (RH), fractional cloud cover (C), total column cloud liquid water (clw), and total column cloud ice water (ciw).  $T_a$  governs the thermal radiation emitted by the atmosphere, as described by the Stefan–Boltzmann law. RH modifies the atmospheric emissivity by representing the water vapor content. C quantifies the cloud's overall presence, while clw and ciw capture the thermal contributions of liquid and ice clouds, respectively, enabling a more accurate characterization of cloud radiative effects."*

**Comment #25:**

*Paragraph 2 of the Conclusion. Please also clarify how satellite data must be used to run the Modnew*

***Response:***

Thank you for this valuable suggestion. We have expanded the conclusion to clarify the role of satellite data in running the Modnew model. The revised text is as follows:

*“The Modnew model relies on specific atmospheric and cloud-related parameters for accurate RI estimation. While inputs such as Ta and RH are commonly obtained from in situ measurements, critical cloud-related parameters (i.e. clw and ciw) are typically derived from satellite products or reanalysis datasets, such as ERA5. These parameters are essential for capturing the radiative properties of clouds, which in situ measurements alone cannot reliably provide. Therefore, satellite data or reanalysis products are indispensable for supplying these inputs.”*
